# Supplementary material for: New proteomic signature in circulating extracellular vesicles from tumor-draining and peripheral veins of patients with lung adenocarcinoma
Source: Research Square preprint supplement (doi:10.21203/rs.3.rs-7543827/v1), 2025-09-23
Supplement: Supplementary file 1 [file 1dd3dc49742d1dbcc84c8e47.docx]

**Supplementary Table 1.** Deregulated proteins in lung adenocarcinoma as compared to non-tumoral tissues identified by mass spectrometry, according to the following thresholds: |log2 fold change| ≥ 1 and adjusted p value (Benjamini-Hochberg multiple testing correction) ≤ 0.05.

The last two columns correspond to parameters calculated using external data from NCI-PDC000563 on 444/466 proteins retrieved from this dataset (https://proteomic.datacommons.cancer.gov/pdc/study/PDC000563). To facilitate comparison of the deregulations obtained from the two proteomic analyses, minimal fold change (less than 20%) is shown in black. Sixty-six (15%) proteins shows similar level between ADK and normal tissue in external dataset.

| **Official Gene Symbol** | **Uniprot ID** | **log2 Fold Change (T vs NT)** | **adjusted p value** | **log2 Fold Change (T vs NT) - NCI PDC000563** | **adjusted p value - NCI PDC000563** |
| --- | --- | --- | --- | --- | --- |
| PYCR1 | P32322 | 4,04 | 9,43E-09 | 1,09 | 1,4E-33 |
| GOLM1 | Q8NBJ4 | 2,97 | 1,37E-07 | 1,22 | 4,6E-39 |
| TUBB3 | Q13509 | 2,42 | 3,38E-05 | 0,08 | 1,5E-03 |
| S100B | P04271 | 2,38 | 4,35E-05 | 0,13 | 1,4E-01 |
| TMEM165 | Q9HC07 | 2,3 | 3,49E-06 | 0,74 | 1,2E-36 |
| OCIAD2 | Q56VL3 | 2,29 | 1,37E-05 | 1,46 | 2,0E-35 |
| CYP1B1 | Q16678 | 2,29 | 0,001765407 | 0,36 | 3,8E-04 |
| CPD | O75976 | 2,26 | 0,000127022 | 1,17 | 1,4E-34 |
| UGT1A6 | P19224 | 2,25 | 0,006993255 | 0,00 | 9,9E-01 |
| PES1 | O00541 | 2,2 | 2,97E-08 | 0,55 | 4,0E-40 |
| MZB1 | Q8WU39 | 2,18 | 0,002047982 | 0,49 | 1,8E-08 |
| RBM47 | A0AV96 | 2,17 | 1,81E-08 | 0,46 | 3,1E-30 |
| FCGBP | Q9Y6R7 | 2,12 | 0,000130139 | 0,22 | 3,2E-02 |
| MCM3 | P25205 | 2,11 | 3,25E-05 | 0,87 | 4,0E-25 |
| PDLIM4 | P50479 | 1,93 | 4,03E-06 | 0,55 | 3,3E-16 |
| CTHRC1 | Q96CG8 | 1,92 | 0,000118446 | 1,40 | 6,0E-38 |
| LAD1 | O00515 | 1,91 | 4,11E-05 | 1,22 | 8,8E-34 |
| DCTPP1 | Q9H773 | 1,86 | 7,66E-06 | 0,69 | 4,1E-23 |
| TUBA1C | Q9BQE3 | 1,79 | 6,94E-06 | -0,05 | 2,6E-02 |
| NUP85 | Q9BW27 | 1,78 | 2,54E-05 | 0,11 | 1,3E-07 |
| GALNT2 | Q10471 | 1,77 | 6,93E-06 | 0,58 | 9,1E-32 |
| FKBP11 | Q9NYL4 | 1,77 | 2,68E-05 | 0,91 | 1,7E-25 |
| PPP1R14B | Q96C90 | 1,75 | 9,43E-07 | 0,83 | 5,9E-34 |
| GFPT1 | Q06210 | 1,74 | 2,10E-06 | 0,77 | 1,9E-46 |
| CASP6 | P55212 | 1,73 | 2,03E-06 | 0,51 | 1,0E-29 |
| NEU1 | Q99519 | 1,73 | 5,33E-05 | 0,57 | 5,1E-23 |
| PC | P11498 | 1,72 | 3,95E-06 | 0,68 | 1,0E-20 |
| CRABP2 | P29373 | 1,72 | 0,000138023 | 1,31 | 4,5E-14 |
| NQO1 | P15559 | 1,68 | 0,005969867 | 0,40 | 5,6E-03 |
| GALNT3 | Q14435 | 1,64 | 6,83E-05 | 0,66 | 3,8E-23 |
| BCS1L | Q9Y276 | 1,64 | 5,94E-05 | 0,10 | 1,5E-02 |
| PTRH2 | Q9Y3E5 | 1,63 | 5,86E-05 | 0,77 | 5,8E-35 |
| SDF2L1 | Q9HCN8 | 1,59 | 5,07E-05 | 0,59 | 4,3E-27 |
| EIF5B | O60841 | 1,58 | 9,92E-05 | 0,55 | 4,3E-48 |
| SPATS2L | Q9NUQ6 | 1,57 | 0,000892923 | 0,69 | 1,5E-30 |
| ADI1 | Q9BV57 | 1,55 | 4,91E-05 | 0,63 | 2,2E-37 |
| SLC35B2 | Q8TB61 | 1,55 | 1,38E-05 | 0,63 | 4,1E-32 |
| PAK1 | Q13153 | 1,55 | 6,45E-05 | 0,34 | 4,6E-27 |
| FAP | Q12884 | 1,55 | 0,003825763 | 0,64 | 1,1E-19 |
| AKR1C1 | Q04828 | 1,55 | 0,010839734 | -0,28 | 3,3E-02 |
| RCN3 | Q96D15 | 1,54 | 0,001170267 | 0,60 | 8,9E-19 |
| NLN | Q9BYT8 | 1,5 | 7,31E-06 | 0,71 | 1,3E-34 |
| FEN1 | P39748 | 1,47 | 0,001196246 | 0,72 | 5,2E-36 |
| UBQLN1 | Q9UMX0 | 1,47 | 0,000891738 | 0,09 | 1,6E-07 |
| SERPINH1 | P50454 | 1,46 | 0,000747569 | 0,67 | 4,9E-36 |
| CRTAP | O75718 | 1,46 | 0,001369952 | 0,69 | 6,8E-36 |
| FAM3C | Q92520 | 1,46 | 9,68E-05 | 0,72 | 1,8E-21 |
| EIF2B5 | Q13144 | 1,46 | 2,31E-06 | 0,20 | 7,6E-20 |
| ALDH1A3 | P47895 | 1,46 | 0,010225178 | 0,06 | 3,4E-01 |
| FAU | P62861 | 1,45 | 0,000412122 | 0,35 | 2,7E-16 |
| AGR2 | O95994 | 1,44 | 0,002598472 | 0,83 | 3,0E-12 |
| UCHL1 | P09936 | 1,43 | 0,00290664 | 0,09 | 2,9E-01 |
| UGDH | O60701 | 1,42 | 0,000751072 | 0,65 | 4,3E-16 |
| CHORDC1 | Q9UHD1 | 1,41 | 0,000684891 | 0,47 | 3,0E-23 |
| ALDH18A1 | P54886 | 1,4 | 9,54E-07 | 0,92 | 3,7E-42 |
| SLC25A10 | Q9UBX3 | 1,4 | 3,09E-06 | 0,58 | 1,6E-19 |
| BCCIP | Q9P287 | 1,38 | 4,11E-05 | 0,34 | 5,4E-13 |
| RPL19 | P84098 | 1,37 | 0,001760542 | 0,10 | 1,1E-02 |
| SEC14L2 | O76054 | 1,37 | 0,001003813 | 0,07 | 1,4E-01 |
| TNC | P24821 | 1,36 | 0,012732216 | 0,88 | 2,2E-20 |
| MAN1B1 | Q9UKM7 | 1,36 | 3,67E-05 | 0,20 | 1,1E-03 |
| RPL24 | P83731 | 1,35 | 2,63E-05 | 0,13 | 2,2E-02 |
| SLC3A2 | P08195 | 1,34 | 0,003663465 | 0,40 | 5,6E-13 |
| SMAD4 | Q13485 | 1,34 | 0,00051138 | -0,16 | 1,7E-08 |
| CD38 | P28907 | 1,32 | 0,048520318 | 0,48 | 1,4E-09 |
| ISG15 | P05161 | 1,32 | 0,000655838 | 0,45 | 9,2E-09 |
| MCM6 | Q14566 | 1,31 | 0,000149968 | 0,87 | 5,0E-24 |
| STEAP3 | Q658P3 | 1,31 | 1,44E-06 | 0,22 | 1,6E-04 |
| RPL23 | P62829 | 1,3 | 0,003171311 | 0,33 | 1,3E-25 |
| FKBP10 | Q96AY3 | 1,3 | 0,013941166 | 0,75 | 2,9E-24 |
| NT5C3A | Q9H0P0 | 1,3 | 0,000425794 | 0,51 | 5,5E-17 |
| CLPTM1 | O96005 | 1,3 | 0,00047677 | 0,33 | 2,1E-13 |
| COG3 | Q96JB2 | 1,29 | 9,43E-07 | 0,48 | 4,5E-35 |
| TPMT | P51580 | 1,29 | 0,00058922 | 0,48 | 7,2E-27 |
| FUT8 | Q9BYC5 | 1,29 | 8,13E-06 | 0,71 | 5,0E-11 |
| HDHD3 | Q9BSH5 | 1,29 | 0,000110565 | -0,03 | 4,8E-01 |
| SLC16A3 | O15427 | 1,28 | 6,80E-05 | 0,86 | 2,7E-31 |
| AP1M2 | Q9Y6Q5 | 1,25 | 0,00014121 | 0,41 | 2,4E-20 |
| RSL1D1 | O76021 | 1,24 | 5,24E-05 | 0,59 | 4,1E-23 |
| RPL27A | P46776 | 1,24 | 4,98E-06 | 0,32 | 3,2E-15 |
| SRPRB | Q9Y5M8 | 1,22 | 5,55E-06 | 0,77 | 1,0E-39 |
| NSUN2 | Q08J23 | 1,22 | 1,18E-05 | 0,69 | 6,7E-37 |
| PDXDC1 | Q6P996 | 1,22 | 0,000127459 | 0,66 | 2,8E-34 |
| IL4I1 | Q96RQ9 | 1,22 | 0,005753725 | 0,86 | 4,9E-24 |
| CDV3 | Q9UKY7 | 1,22 | 0,000369585 | 0,16 | 2,9E-09 |
| AGA | P20933 | 1,22 | 0,007645818 | 0,29 | 3,5E-05 |
| SNAP29 | O95721 | 1,22 | 0,00313284 | 0,11 | 8,7E-05 |
| SPINT2 | O43291 | 1,21 | 0,000841601 | 0,75 | 4,4E-20 |
| GLB1 | P16278 | 1,21 | 0,002543473 | 0,36 | 8,3E-19 |
| TMCO1 | Q9UM00 | 1,21 | 0,000343997 | 0,43 | 3,8E-17 |
| PFKP | Q01813 | 1,21 | 8,50E-05 | 0,48 | 1,1E-16 |
| FAHD1 | Q6P587 | 1,2 | 0,003246611 | -0,15 | 5,5E-03 |
| GALE | Q14376 | 1,18 | 1,23E-05 | 0,36 | 5,7E-12 |
| CIT | O14578 | 1,18 | 0,017651986 | 0,61 | 9,2E-09 |
| ERO1A | Q96HE7 | 1,17 | 4,15E-05 | 1,21 | 7,5E-39 |
| SHMT2 | P34897 | 1,17 | 2,50E-05 | 0,76 | 8,9E-27 |
| NAXE | Q8NCW5 | 1,17 | 2,37E-06 | 0,17 | 6,2E-08 |
| POSTN | Q15063 | 1,17 | 0,003940669 | 0,30 | 3,2E-05 |
| DKC1 | O60832 | 1,16 | 0,002240309 | 0,70 | 1,4E-56 |
| BZW2 | Q9Y6E2 | 1,16 | 0,000415456 | 0,99 | 3,7E-53 |
| PSME3 | P61289 | 1,16 | 4,21E-06 | 0,62 | 1,8E-50 |
| PLOD1 | Q02809 | 1,16 | 0,006508024 | 0,49 | 1,1E-21 |
| NAMPT | P43490 | 1,16 | 0,00129936 | 0,67 | 6,5E-15 |
| SURF4 | O15260 | 1,16 | 0,000327947 | -0,02 | 6,3E-01 |
| BPNT2 | Q9NX62 | 1,16 | 0,000378755 | n.d | n.d |
| HID1 | Q8IV36 | 1,15 | 4,17E-05 | 0,58 | 4,4E-21 |
| B4GALT1 | P15291 | 1,15 | 1,40E-06 | 0,45 | 2,3E-14 |
| NIPSNAP1 | Q9BPW8 | 1,15 | 0,00108148 | 0,20 | 1,6E-08 |
| EIF3K | Q9UBQ5 | 1,15 | 0,008819761 | 0,09 | 2,6E-04 |
| RPL31 | P62899 | 1,14 | 2,58E-05 | 0,25 | 1,8E-13 |
| ARFGAP1 | Q8N6T3 | 1,13 | 0,000179855 | 0,58 | 1,0E-42 |
| DDX21 | Q9NR30 | 1,13 | 0,00029923 | 0,70 | 1,9E-28 |
| ADGRE5 | P48960 | 1,13 | 0,002909721 | 0,11 | 1,7E-03 |
| OAT | P04181 | 1,12 | 0,006969032 | 0,74 | 1,2E-16 |
| ARFGEF1 | Q9Y6D6 | 1,11 | 0,000148136 | 0,37 | 3,0E-25 |
| RRP12 | Q5JTH9 | 1,09 | 0,00102395 | 0,57 | 2,5E-34 |
| FTSJ3 | Q8IY81 | 1,09 | 0,000792568 | 0,46 | 1,1E-27 |
| PUS1 | Q9Y606 | 1,08 | 0,000546641 | 0,58 | 1,3E-31 |
| TMED3 | Q9Y3Q3 | 1,08 | 0,000136694 | 0,72 | 1,2E-28 |
| TMTC3 | Q6ZXV5 | 1,08 | 0,000115609 | 0,08 | 1,3E-02 |
| SERPINB5 | P36952 | 1,08 | 0,019109927 | 0,31 | 7,5E-02 |
| SGPL1 | O95470 | 1,07 | 5,77E-05 | 0,63 | 1,1E-32 |
| TMEM87B | Q96K49 | 1,07 | 0,001928988 | 0,75 | 9,9E-31 |
| IDE | P14735 | 1,07 | 0,000527262 | 0,41 | 1,1E-27 |
| MYBBP1A | Q9BQG0 | 1,07 | 0,000207434 | 0,52 | 1,5E-24 |
| SEC23IP | Q9Y6Y8 | 1,06 | 0,010397674 | 0,33 | 4,0E-32 |
| NOL3 | O60936 | 1,06 | 5,88E-05 | 0,26 | 1,1E-03 |
| AMACR | Q9UHK6 | 1,06 | 0,002010974 | 0,14 | 1,4E-02 |
| S100P | P25815 | 1,06 | 0,031170776 | 0,36 | 4,4E-02 |
| HM13 | Q8TCT9 | 1,05 | 0,00011223 | 0,66 | 5,4E-30 |
| DSG2 | Q14126 | 1,04 | 0,02662929 | 0,55 | 1,9E-19 |
| RPL7A | P62424 | 1,04 | 2,34E-06 | 0,25 | 1,6E-10 |
| MAN2A1 | Q16706 | 1,04 | 0,007822015 | 0,29 | 2,0E-10 |
| RAB9A | P51151 | 1,04 | 0,018227802 | 0,08 | 1,5E-02 |
| HSP90B2P | Q58FF3 | 1,04 | 0,000138382 | n.d | n.d |
| TMEM214 | Q6NUQ4 | 1,03 | 0,004631536 | 0,65 | 4,2E-35 |
| RAB25 | P57735 | 1,03 | 0,000111636 | 0,38 | 6,1E-09 |
| ARFIP1 | P53367 | 1,03 | 0,00290664 | 0,13 | 3,6E-07 |
| FAM114A2 | Q9NRY5 | 1,03 | 0,000724574 | 0,04 | 1,3E-01 |
| SLC16A4 | O15374 | 1,03 | 0,000461579 | n.d | n.d |
| LSR | Q86X29 | 1,02 | 0,000655087 | 0,56 | 2,6E-23 |
| RPS17 | P08708 | 1,01 | 8,78E-06 | 0,49 | 2,5E-49 |
| CRELD2 | Q6UXH1 | 1,01 | 0,00051181 | 0,98 | 4,7E-34 |
| FUBP3 | Q96I24 | 1,01 | 0,001580465 | 0,24 | 1,1E-24 |
| PPIC | P45877 | 1,01 | 0,000197634 | 0,41 | 1,5E-22 |
| DUSP23 | Q9BVJ7 | 1,01 | 0,000232456 | 0,18 | 5,2E-07 |
| GLA | P06280 | 1,01 | 0,037578152 | 0,28 | 1,2E-05 |
| NAE1 | Q13564 | 1,01 | 0,000769851 | 0,04 | 3,3E-02 |
| VCL | P18206 | -1,01 | 5,98E-06 | -0,78 | 4,4E-63 |
| ABCA3 | Q99758 | -1,01 | 0,000620952 | -1,24 | 1,2E-47 |
| PGLYRP2 | Q96PD5 | -1,01 | 0,000236336 | -0,85 | 1,2E-45 |
| PTPRG | P23470 | -1,01 | 2,54E-05 | -0,69 | 4,7E-38 |
| FGA | P02671 | -1,01 | 0,018266214 | -1,04 | 1,1E-37 |
| ZYX | Q15942 | -1,02 | 3,48E-05 | -0,59 | 1,8E-55 |
| HCFC1 | P51610 | -1,02 | 0,000150224 | 0,19 | 1,8E-24 |
| CYP27A1 | Q02318 | -1,02 | 0,001352079 | -0,77 | 8,2E-24 |
| RAC1 | P63000 | -1,02 | 2,55E-06 | -0,24 | 1,3E-16 |
| ATP5PD | O75947 | -1,02 | 3,49E-06 | 0,09 | 1,4E-02 |
| MTARC2 | Q969Z3 | -1,02 | 0,000200261 | n.d | n.d |
| MXRA7 | P84157 | -1,03 | 9,92E-05 | -0,39 | 4,3E-11 |
| H3-7 | Q5TEC6 | -1,03 | 0,001764671 | n.d | n.d |
| GNAQ | P50148 | -1,04 | 0,000347462 | -0,86 | 5,4E-65 |
| CD82 | P27701 | -1,04 | 0,012638938 | -0,42 | 1,6E-11 |
| HNRNPH3 | P31942 | -1,04 | 0,007168145 | 0,12 | 2,2E-08 |
| SEPTIN11 | Q9NVA2 | -1,04 | 6,89E-07 | n.d | n.d |
| PCYOX1 | Q9UHG3 | -1,05 | 3,49E-06 | -0,70 | 1,0E-64 |
| GPX3 | P22352 | -1,05 | 0,000574265 | -0,87 | 1,8E-37 |
| APOA4 | P06727 | -1,05 | 0,003670017 | -0,94 | 2,1E-35 |
| NEK7 | Q8TDX7 | -1,05 | 0,001765407 | -0,43 | 2,1E-29 |
| ITGA6 | P23229 | -1,05 | 0,009391907 | -0,64 | 4,4E-21 |
| FERMT2 | Q96AC1 | -1,06 | 0,003765036 | -1,08 | 8,3E-79 |
| TF | P02787 | -1,06 | 0,00392286 | -0,91 | 4,9E-50 |
| LLGL2 | Q6P1M3 | -1,06 | 0,000140503 | -0,63 | 1,3E-31 |
| BTN3A2 | P78410 | -1,06 | 6,78E-05 | -0,59 | 2,3E-26 |
| HLA-E | P13747 | -1,06 | 0,000412585 | n.d | n.d |
| FCN3 | O75636 | -1,07 | 0,000763763 | -1,39 | 7,0E-63 |
| CD59 | P13987 | -1,07 | 2,67E-05 | -0,27 | 2,1E-05 |
| ADD1 | P35611 | -1,08 | 3,32E-05 | -0,86 | 1,9E-70 |
| BCAM | P50895 | -1,08 | 1,41E-05 | -1,27 | 1,9E-66 |
| VWF | P04275 | -1,08 | 6,36E-05 | -1,30 | 1,1E-65 |
| KCTD12 | Q96CX2 | -1,08 | 1,42E-06 | -0,64 | 5,6E-54 |
| FLNC | Q14315 | -1,08 | 0,014078388 | -0,70 | 1,3E-28 |
| SVIL | O95425 | -1,08 | 0,0304392 | -0,33 | 3,7E-22 |
| TRIP10 | Q15642 | -1,08 | 8,11E-05 | -0,24 | 5,9E-14 |
| CHMP1B | Q7LBR1 | -1,08 | 0,001428795 | 0,06 | 2,4E-01 |
| SH3D19 | Q5HYK7 | -1,09 | 6,52E-06 | -0,74 | 5,4E-56 |
| DDAH2 | O95865 | -1,09 | 9,45E-06 | -0,76 | 1,3E-55 |
| AGT | P01019 | -1,09 | 0,024154148 | -0,96 | 7,3E-47 |
| CSRP1 | P21291 | -1,09 | 0,001097241 | -0,68 | 6,4E-42 |
| TMEM119 | Q4V9L6 | -1,09 | 9,68E-07 | -0,95 | 2,5E-34 |
| ALDH1A1 | P00352 | -1,1 | 0,000127022 | -1,05 | 6,0E-47 |
| DNAJB4 | Q9UDY4 | -1,1 | 0,011796993 | -0,70 | 8,3E-43 |
| POLD1 | P28340 | -1,1 | 8,54E-06 | 0,28 | 2,8E-17 |
| RAB8B | Q92930 | -1,1 | 2,55E-06 | -0,13 | 1,5E-06 |
| SEPTIN10 | Q9P0V9 | -1,1 | 2,39E-05 | n.d | n.d |
| CALCRL | Q16602 | -1,11 | 0,015007641 | -1,73 | 1,5E-68 |
| IFIT3 | O14879 | -1,11 | 0,007814608 | -0,42 | 1,7E-11 |
| SNTB2 | Q13425 | -1,12 | 0,006014462 | -0,78 | 4,4E-66 |
| CADM1 | Q9BY67 | -1,12 | 0,006919724 | -0,31 | 6,5E-08 |
| ISYNA1 | Q9NPH2 | -1,12 | 0,004402734 | -0,15 | 4,7E-04 |
| SARG | Q9BW04 | -1,12 | 0,001908428 | n.d | n.d |
| NEBL | O76041 | -1,13 | 3,03E-05 | -1,21 | 3,2E-73 |
| MPP1 | Q00013 | -1,13 | 0,000269519 | -0,78 | 1,2E-39 |
| ITIH2 | P19823 | -1,13 | 0,000686435 | -0,88 | 8,1E-38 |
| VIM | P08670 | -1,13 | 5,68E-05 | -0,50 | 2,5E-36 |
| CRIP2 | P52943 | -1,13 | 0,000819457 | -0,69 | 1,9E-28 |
| CYB5A | P00167 | -1,13 | 6,33E-05 | -0,60 | 4,3E-18 |
| SELENOT | P62341 | -1,13 | 0,000583421 | 0,06 | 3,3E-01 |
| PALMD | Q9NP74 | -1,14 | 0,000413097 | -1,26 | 6,2E-61 |
| MYL9 | P24844 | -1,14 | 0,000945769 | -0,64 | 1,5E-46 |
| APCS | P02743 | -1,14 | 0,00215016 | -1,14 | 4,8E-27 |
| RALA | P11233 | -1,15 | 5,33E-05 | -0,70 | 6,4E-44 |
| APOB | P04114 | -1,15 | 0,000519221 | -1,22 | 2,1E-43 |
| LSAMP | Q13449 | -1,15 | 8,33E-06 | -0,91 | 8,8E-34 |
| CD5L | O43866 | -1,15 | 0,033171861 | -0,95 | 3,5E-28 |
| H1-2 | P16403 | -1,15 | 1,33E-05 | n.d | n.d |
| H1-4 | P10412 | -1,15 | 1,33E-05 | n.d | n.d |
| CRMP1 | Q14194 | -1,17 | 0,000327947 | -0,74 | 6,8E-52 |
| FGB | P02675 | -1,17 | 0,009336211 | -1,00 | 1,8E-34 |
| PDLIM3 | Q53GG5 | -1,17 | 0,006926868 | -0,41 | 1,3E-20 |
| AP3B1 | O00203 | -1,17 | 3,15E-07 | 0,16 | 5,6E-16 |
| AK4 | P27144 | -1,17 | 0,002340981 | 0,56 | 2,8E-13 |
| KRT20 | P35900 | -1,17 | 0,029451921 | 0,59 | 1,2E-07 |
| APOC1 | P02654 | -1,18 | 0,007960582 | -1,20 | 3,5E-39 |
| EPB41L3 | Q9Y2J2 | -1,18 | 0,000346648 | -0,43 | 2,3E-26 |
| SERPING1 | P05155 | -1,19 | 0,001499669 | -1,08 | 2,4E-57 |
| GLIPR2 | Q9H4G4 | -1,19 | 6,59E-06 | -0,65 | 1,7E-53 |
| CD9 | P21926 | -1,19 | 2,22E-05 | -0,75 | 3,6E-35 |
| H2AC20 | Q16777 | -1,19 | 6,95E-05 | n.d | n.d |
| PLVAP | Q9BX97 | -1,2 | 0,000421827 | -0,84 | 6,7E-29 |
| ACP5 | P13686 | -1,2 | 0,022396581 | -1,23 | 4,0E-27 |
| CD55 | P08174 | -1,2 | 0,000577279 | -0,80 | 3,3E-26 |
| AMPD3 | Q01432 | -1,2 | 0,001105961 | 0,11 | 3,5E-03 |
| MYO1C | O00159 | -1,21 | 5,32E-07 | -1,39 | 3,1E-93 |
| DOCK4 | Q8N1I0 | -1,21 | 1,52E-05 | -0,83 | 7,2E-70 |
| SORBS2 | O94875 | -1,21 | 0,031504829 | -1,13 | 1,4E-49 |
| CYGB | Q8WWM9 | -1,21 | 0,000207598 | -0,59 | 1,0E-27 |
| CACNA2D2 | Q9NY47 | -1,21 | 0,009992923 | -1,04 | 2,0E-25 |
| FXYD1 | O00168 | -1,21 | 0,001584332 | -1,03 | 3,6E-10 |
| SULT1A4 | P0DMN0 | -1,21 | 0,007535331 | n.d | n.d |
| COL6A6 | A6NMZ7 | -1,22 | 0,003399807 | -1,81 | 8,5E-76 |
| RDX | P35241 | -1,22 | 7,61E-07 | -0,62 | 6,2E-68 |
| MCEMP1 | Q8IX19 | -1,22 | 0,008819761 | -0,92 | 6,5E-26 |
| HPGD | P15428 | -1,22 | 0,032004054 | -0,68 | 3,6E-06 |
| CNN1 | P51911 | -1,23 | 0,033396288 | -1,16 | 2,6E-49 |
| RHD | Q02161 | -1,23 | 0,001124664 | n.d | n.d |
| SNCA | P37840 | -1,24 | 2,74E-05 | -1,62 | 6,6E-53 |
| PRTN3 | P24158 | -1,24 | 0,019663556 | -0,50 | 7,6E-09 |
| EHD4 | Q9H223 | -1,25 | 5,77E-07 | -1,10 | 4,3E-86 |
| DPYSL2 | Q16555 | -1,25 | 2,73E-07 | -0,83 | 2,2E-61 |
| MYLK | Q15746 | -1,25 | 0,000197536 | -0,93 | 3,0E-46 |
| PLPP3 | O14495 | -1,25 | 6,87E-06 | -0,59 | 3,9E-28 |
| HP | P00738 | -1,25 | 0,033396288 | -0,76 | 3,5E-11 |
| ERN1 | O75460 | -1,25 | 0,002653604 | -0,12 | 1,2E-02 |
| SULT1A1 | P50225 | -1,26 | 0,00151811 | -1,16 | 6,0E-53 |
| TPSB2 | P20231 | -1,26 | 0,002970004 | -1,29 | 6,6E-40 |
| GTF2IRD2 | Q86UP8 | -1,26 | 0,002632009 | n.d | n.d |
| LUM | P51884 | -1,27 | 0,000237946 | -1,07 | 3,2E-53 |
| PRKG1 | Q13976 | -1,27 | 0,000184112 | -1,06 | 1,0E-52 |
| RECK | O95980 | -1,27 | 0,000141221 | -0,89 | 4,4E-43 |
| OCLN | Q16625 | -1,27 | 0,001002152 | -0,17 | 4,2E-03 |
| TJP1 | Q07157 | -1,28 | 5,20E-07 | -0,83 | 6,2E-65 |
| USO1 | O60763 | -1,28 | 0,000401882 | 0,49 | 1,6E-53 |
| ANXA2 | P07355 | -1,28 | 7,82E-07 | -0,80 | 6,6E-52 |
| RALB | P11234 | -1,28 | 0,001810375 | -0,56 | 6,6E-43 |
| SND1 | Q7KZF4 | -1,28 | 0,001680803 | 0,36 | 1,7E-38 |
| MACF1 | Q9UPN3 | -1,28 | 1,37E-07 | -0,49 | 2,2E-32 |
| IRF4 | Q15306 | -1,28 | 0,002593333 | 0,55 | 8,4E-08 |
| DCN | P07585 | -1,29 | 0,001337651 | -1,29 | 8,6E-57 |
| STOM | P27105 | -1,29 | 2,39E-05 | -0,90 | 1,6E-44 |
| TRMT61A | Q96FX7 | -1,29 | 0,003407076 | 0,26 | 6,4E-08 |
| GUCY1B1 | Q02153 | -1,3 | 7,03E-06 | -0,85 | 9,5E-58 |
| ANXA9 | O76027 | -1,3 | 1,72E-06 | -0,60 | 1,3E-13 |
| RTN3 | O95197 | -1,3 | 0,000213943 | -0,03 | 3,3E-01 |
| WFS1 | O76024 | -1,31 | 6,89E-07 | -1,00 | 1,3E-58 |
| LMOD1 | P29536 | -1,31 | 0,002744414 | -1,19 | 2,1E-48 |
| LAMP3 | Q9UQV4 | -1,31 | 0,000139364 | -1,36 | 3,8E-33 |
| SAMM50 | Q9Y512 | -1,31 | 0,001039787 | 0,20 | 8,3E-08 |
| ANXA13 | P27216 | -1,31 | 4,00E-07 | -0,09 | 1,9E-01 |
| S100A4 | P26447 | -1,32 | 1,64E-05 | -0,84 | 8,2E-43 |
| SPON1 | Q9HCB6 | -1,32 | 0,000197536 | -1,07 | 7,8E-40 |
| FHOD1 | Q9Y613 | -1,32 | 3,96E-05 | -0,47 | 2,9E-30 |
| ITGA3 | P26006 | -1,32 | 1,78E-05 | -0,71 | 1,9E-27 |
| KRT4 | P19013 | -1,32 | 0,000718514 | -0,60 | 3,5E-20 |
| PARVA | Q9NVD7 | -1,33 | 0,000138382 | -1,08 | 1,6E-71 |
| MYADM | Q96S97 | -1,33 | 1,39E-05 | -0,51 | 5,3E-27 |
| FABP5 | Q01469 | -1,33 | 8,03E-05 | -0,73 | 1,9E-19 |
| SLC30A9 | Q6PML9 | -1,33 | 0,000168151 | 0,37 | 3,2E-12 |
| SERPIND1 | P05546 | -1,34 | 0,001045397 | -1,18 | 2,5E-58 |
| MYH10 | P35580 | -1,34 | 4,35E-05 | -0,78 | 5,8E-54 |
| S100A12 | P80511 | -1,34 | 0,008240675 | -0,67 | 7,7E-08 |
| ASPM | Q8IZT6 | -1,34 | 0,001731264 | n.d | n.d |
| SERPINA6 | P08185 | -1,35 | 0,006822668 | -1,02 | 1,3E-53 |
| ITIH4 | Q14624 | -1,35 | 0,002625667 | -1,08 | 2,7E-48 |
| PXMP4 | Q9Y6I8 | -1,35 | 0,000195913 | -0,49 | 5,9E-10 |
| S100A10 | P60903 | -1,37 | 9,43E-07 | -0,98 | 2,3E-63 |
| AFM | P43652 | -1,37 | 0,002527921 | -1,01 | 2,7E-46 |
| CD81 | P60033 | -1,37 | 1,18E-05 | -0,62 | 6,8E-25 |
| PSPC1 | Q8WXF1 | -1,37 | 0,000332987 | 0,31 | 1,1E-19 |
| DDT | P30046 | -1,37 | 1,72E-06 | -0,23 | 2,9E-09 |
| AOX1 | Q06278 | -1,38 | 0,0012715 | -1,10 | 3,4E-47 |
| NEXN | Q0ZGT2 | -1,38 | 0,001931642 | -0,86 | 8,2E-40 |
| COL6A1 | P12109 | -1,38 | 0,011763271 | -0,68 | 1,0E-27 |
| SPTAN1 | Q13813 | -1,39 | 1,80E-06 | -0,94 | 5,8E-79 |
| LMCD1 | Q9NZU5 | -1,39 | 0,000127459 | -0,89 | 3,6E-48 |
| ABLIM1 | O14639 | -1,4 | 0,000480349 | -1,19 | 6,7E-63 |
| CFD | P00746 | -1,4 | 0,006205252 | -0,82 | 6,0E-43 |
| SLC44A2 | Q8IWA5 | -1,4 | 2,61E-05 | -0,99 | 2,1E-38 |
| HCFC2 | Q9Y5Z7 | -1,4 | 0,000432369 | -0,28 | 1,3E-25 |
| AHNAK | Q09666 | -1,41 | 2,73E-07 | -1,25 | 1,6E-73 |
| TPM2 | P07951 | -1,41 | 0,007234638 | -0,57 | 1,3E-23 |
| APOA1 | P02647 | -1,42 | 0,001249824 | -1,11 | 1,1E-49 |
| MAB21L4 | Q08AI8 | -1,42 | 0,000138382 | -1,17 | 5,4E-45 |
| AQP1 | P29972 | -1,42 | 0,000819428 | -1,20 | 1,8E-32 |
| STXBP1 | P61764 | -1,43 | 0,000281579 | -0,72 | 4,1E-44 |
| EPB41 | P11171 | -1,43 | 2,85E-05 | -0,98 | 1,3E-40 |
| ANO6 | Q4KMQ2 | -1,43 | 1,18E-06 | -0,56 | 5,0E-35 |
| APOA2 | P02652 | -1,44 | 0,002211648 | -1,11 | 4,7E-50 |
| ARMC1 | Q9NVT9 | -1,45 | 1,28E-05 | 0,03 | 1,6E-01 |
| DES | P17661 | -1,47 | 0,00079089 | -1,46 | 2,9E-60 |
| ADD3 | Q9UEY8 | -1,47 | 0,000197634 | -0,82 | 2,5E-57 |
| PRDX2 | P32119 | -1,47 | 0,002017188 | -1,04 | 2,0E-41 |
| GNAI1 | P63096 | -1,47 | 8,97E-05 | -0,42 | 4,3E-31 |
| PPBP | P02775 | -1,48 | 0,001760598 | -1,63 | 9,9E-46 |
| BST2 | Q10589 | -1,48 | 0,000211672 | -0,49 | 1,0E-07 |
| A2M | P01023 | -1,49 | 4,11E-05 | -1,23 | 3,8E-57 |
| PRELP | P51888 | -1,49 | 0,000184281 | -1,18 | 4,0E-52 |
| CA3 | P07451 | -1,49 | 6,73E-05 | -1,67 | 3,9E-47 |
| PKP3 | Q9Y446 | -1,49 | 0,002803928 | 0,49 | 5,3E-18 |
| TSPAN8 | P19075 | -1,49 | 0,005119711 | 0,05 | 7,4E-01 |
| RRAS2 | P62070 | -1,5 | 2,30E-07 | -0,84 | 1,8E-57 |
| F9 | P00740 | -1,5 | 1,45E-06 | -1,17 | 4,1E-55 |
| HSD17B6 | O14756 | -1,5 | 0,007960582 | -1,01 | 1,6E-19 |
| FBLN5 | Q9UBX5 | -1,51 | 0,000206618 | -0,86 | 1,4E-27 |
| DNAJB6 | O75190 | -1,51 | 0,000107997 | -0,31 | 6,6E-13 |
| EHD3 | Q9NZN3 | -1,52 | 1,48E-05 | -1,39 | 9,8E-71 |
| LMO7 | Q8WWI1 | -1,52 | 5,32E-07 | -0,81 | 1,5E-53 |
| KANK2 | Q63ZY3 | -1,53 | 6,70E-06 | -1,08 | 1,0E-58 |
| CKB | P12277 | -1,53 | 9,52E-05 | -0,92 | 1,4E-29 |
| MAOB | P27338 | -1,54 | 1,72E-06 | -0,87 | 1,2E-31 |
| COL6A2 | P12110 | -1,54 | 0,007811501 | -0,68 | 1,1E-27 |
| CD151 | P48509 | -1,55 | 7,47E-05 | -0,30 | 7,1E-08 |
| TNS1 | Q9HBL0 | -1,57 | 5,28E-06 | -1,17 | 3,6E-78 |
| SFTPC | P11686 | -1,57 | 0,000111636 | -1,62 | 3,1E-77 |
| RRAS | P10301 | -1,57 | 3,49E-06 | -1,17 | 6,6E-75 |
| DMTN | Q08495 | -1,58 | 0,005592134 | -1,46 | 4,3E-59 |
| C1orf198 | Q9H425 | -1,58 | 6,54E-05 | -0,74 | 7,5E-49 |
| TPPP | O94811 | -1,58 | 1,36E-05 | -1,43 | 9,8E-46 |
| AEBP1 | Q8IUX7 | -1,58 | 6,68E-06 | -0,15 | 1,1E-03 |
| DMBT1 | Q9UGM3 | -1,58 | 0,026095359 | -0,01 | 9,5E-01 |
| EHD1 | Q9H4M9 | -1,59 | 1,25E-05 | -1,20 | 6,8E-84 |
| GNG2 | P59768 | -1,6 | 9,43E-09 | -0,51 | 2,2E-22 |
| AKAP12 | Q02952 | -1,61 | 0,000432197 | -1,16 | 8,5E-59 |
| ABCA8 | O94911 | -1,63 | 0,000505073 | -1,49 | 8,1E-79 |
| EPB41L2 | O43491 | -1,63 | 3,30E-06 | -1,00 | 1,6E-71 |
| HBG1 | P69891 | -1,64 | 0,0013919 | -1,84 | 6,4E-49 |
| CAMP | P49913 | -1,64 | 0,012253123 | -0,55 | 2,3E-05 |
| LIMS4 | P0CW20 | -1,64 | 1,04E-05 | n.d | n.d |
| SPTBN1 | Q01082 | -1,65 | 1,08E-06 | -1,00 | 5,9E-79 |
| HTATIP2 | Q9BUP3 | -1,66 | 4,06E-05 | 0,47 | 4,5E-16 |
| NHERF2 | Q15599 | -1,66 | 1,86E-06 | n.d | n.d |
| RAB23 | Q9ULC3 | -1,68 | 3,47E-06 | -0,71 | 3,4E-43 |
| ITGA1 | P56199 | -1,68 | 7,37E-07 | -0,79 | 5,4E-37 |
| PGM5 | Q15124 | -1,69 | 4,17E-05 | -1,54 | 1,3E-66 |
| ANXA3 | P12429 | -1,7 | 1,86E-06 | -1,23 | 2,4E-50 |
| SYNPO2 | Q9UMS6 | -1,7 | 0,004045203 | -1,20 | 6,0E-49 |
| CNRIP1 | Q96F85 | -1,71 | 2,55E-06 | -1,18 | 1,1E-70 |
| PHF5A | Q7RTV0 | -1,72 | 7,37E-07 | 0,45 | 2,8E-27 |
| DNAH5 | Q8TE73 | -1,72 | 0,003308738 | -0,63 | 6,9E-22 |
| DOCK9 | Q9BZ29 | -1,74 | 0,000260439 | -0,51 | 2,3E-32 |
| APOC3 | P02656 | -1,75 | 0,000111559 | -1,38 | 1,5E-45 |
| MGLL | Q99685 | -1,75 | 0,003825763 | -0,48 | 1,8E-20 |
| SFTPA1 | Q8IWL2 | -1,77 | 0,00083151 | -1,16 | 2,4E-24 |
| CLIC5 | Q9NZA1 | -1,79 | 2,30E-07 | -1,60 | 1,0E-86 |
| PECAM1 | P16284 | -1,79 | 5,32E-07 | -1,26 | 2,2E-77 |
| CYBRD1 | Q53TN4 | -1,79 | 5,35E-05 | -1,28 | 1,0E-39 |
| CSMD2 | Q7Z408 | -1,79 | 0,013034107 | n.d | n.d |
| PF4 | P02776 | -1,8 | 0,006653969 | -1,74 | 2,2E-39 |
| OGN | P20774 | -1,81 | 0,00283027 | -1,88 | 7,2E-62 |
| LRRK2 | Q5S007 | -1,81 | 0,00102395 | -0,83 | 6,4E-31 |
| JAM2 | P57087 | -1,84 | 5,87E-05 | -1,38 | 3,1E-64 |
| PALM2AKAP2 | Q9Y2D5 | -1,84 | 2,84E-06 | n.d | n.d |
| TNS2 | Q63HR2 | -1,85 | 3,49E-06 | -0,98 | 8,9E-76 |
| SORBS3 | O60504 | -1,85 | 3,49E-06 | -1,04 | 1,5E-71 |
| ITGA2B | P08514 | -1,85 | 0,005976165 | -1,33 | 2,4E-40 |
| UACA | Q9BZF9 | -1,86 | 4,12E-06 | -1,02 | 3,7E-60 |
| ADD2 | P35612 | -1,86 | 0,000576932 | -1,45 | 1,5E-54 |
| GYPC | P04921 | -1,86 | 8,33E-06 | -1,02 | 4,7E-35 |
| WAS | P42768 | -1,86 | 5,53E-05 | -0,16 | 1,6E-05 |
| SOD3 | P08294 | -1,87 | 9,82E-05 | -1,30 | 1,3E-66 |
| GSTM5 | P46439 | -1,87 | 0,00238295 | -0,94 | 9,2E-24 |
| NRP1 | O14786 | -1,87 | 3,17E-05 | -0,18 | 1,2E-05 |
| MCAM | P43121 | -1,88 | 7,19E-05 | -1,00 | 9,5E-54 |
| CDH5 | P33151 | -1,9 | 2,30E-07 | -1,44 | 5,7E-84 |
| CA2 | P00918 | -1,9 | 3,02E-05 | -1,45 | 8,4E-44 |
| ABI3BP | Q7Z7G0 | -1,91 | 0,00073793 | -1,41 | 1,5E-55 |
| CHIT1 | Q13231 | -1,92 | 8,54E-06 | -0,50 | 1,1E-03 |
| APOC2 | P02655 | -1,93 | 0,000401751 | n.d | n.d |
| GIMAP8 | Q8ND71 | -1,94 | 2,37E-06 | -1,25 | 4,0E-69 |
| CLDN5 | O00501 | -1,94 | 2,07E-07 | -1,60 | 2,5E-19 |
| EVI2B | P34910 | -1,94 | 0,000158007 | 0,03 | 6,2E-01 |
| CD34 | P28906 | -1,96 | 4,50E-06 | -1,54 | 4,2E-66 |
| EML1 | O00423 | -1,98 | 3,57E-05 | -1,31 | 5,6E-79 |
| IL33 | O95760 | -1,98 | 2,85E-05 | -1,65 | 6,7E-55 |
| HBG2 | P69892 | -1,98 | 0,008958947 | -1,84 | 5,1E-48 |
| HBE1 | P02100 | -1,99 | 7,90E-05 | -1,86 | 1,3E-57 |
| ITGA8 | P53708 | -1,99 | 0,000127459 | -0,83 | 4,6E-35 |
| SIPA1L2 | Q9P2F8 | -1,99 | 0,000141513 | -0,01 | 9,0E-01 |
| CA1 | P00915 | -2,02 | 0,000161776 | -1,73 | 4,5E-54 |
| AK7 | Q96M32 | -2,02 | 0,000806452 | -0,54 | 1,0E-04 |
| UBE2Q2 | Q8WVN8 | -2,02 | 0,000530868 | -0,04 | 4,3E-01 |
| TPPP3 | Q9BW30 | -2,03 | 0,000549882 | -1,56 | 3,0E-36 |
| OLFML3 | Q9NRN5 | -2,06 | 1,70E-05 | -1,53 | 1,4E-63 |
| HBD | P02042 | -2,08 | 8,04E-05 | -1,89 | 9,8E-57 |
| EHD2 | Q9NZN4 | -2,09 | 5,32E-07 | -1,95 | 2,8E-93 |
| CAVIN2 | O95810 | -2,1 | 7,65E-08 | -2,11 | 4,7E-93 |
| HSPA2 | P54652 | -2,12 | 6,70E-06 | -0,08 | 5,1E-04 |
| CLEC14A | Q86T13 | -2,13 | 2,77E-05 | -1,31 | 4,1E-65 |
| MCM5 | P33992 | -2,13 | 0,000232456 | 0,84 | 1,9E-23 |
| KANK3 | Q6NY19 | -2,15 | 2,67E-05 | -1,70 | 4,6E-90 |
| CAVIN3 | Q969G5 | -2,15 | 1,92E-05 | -1,38 | 1,4E-63 |
| HBB | P68871 | -2,15 | 3,25E-05 | -1,89 | 1,4E-57 |
| ANK1 | P16157 | -2,16 | 0,000588228 | -1,58 | 3,8E-53 |
| RASIP1 | Q5U651 | -2,17 | 2,30E-07 | -1,48 | 2,4E-84 |
| CAMK1D | Q8IU85 | -2,17 | 1,59E-05 | 0,21 | 1,4E-04 |
| HBA2 | P69905 | -2,17 | 3,38E-05 | n.d | n.d |
| PODXL | O00592 | -2,18 | 2,37E-06 | -1,35 | 2,8E-58 |
| SLC4A1 | P02730 | -2,18 | 0,000236869 | -1,60 | 1,4E-46 |
| STXBP6 | Q8NFX7 | -2,2 | 0,000116155 | -2,03 | 2,3E-78 |
| ACADL | P28330 | -2,2 | 7,82E-06 | -1,20 | 7,5E-30 |
| ADIRF | Q15847 | -2,21 | 0,000115039 | -1,88 | 8,9E-78 |
| RPS8 | P62241 | -2,22 | 1,81E-06 | 0,25 | 3,3E-08 |
| SLCO2A1 | Q92959 | -2,23 | 9,86E-05 | -1,54 | 1,9E-58 |
| CSTF2 | P33240 | -2,23 | 2,73E-07 | 0,36 | 2,5E-47 |
| RHAG | Q02094 | -2,24 | 0,00014121 | -2,08 | 6,9E-32 |
| CLIC3 | O95833 | -2,27 | 2,21E-06 | -1,21 | 8,0E-52 |
| MME | P08473 | -2,28 | 0,000197634 | -1,27 | 7,8E-44 |
| PRX | Q9BXM0 | -2,29 | 4,17E-05 | -2,21 | 1,0E-69 |
| PDLIM2 | Q96JY6 | -2,3 | 5,12E-06 | -1,19 | 1,9E-68 |
| CAVIN1 | Q6NZI2 | -2,32 | 4,00E-07 | -1,82 | 5,4E-90 |
| AQP4 | P55087 | -2,32 | 1,61E-05 | -1,25 | 1,8E-47 |
| EPB42 | P16452 | -2,34 | 1,59E-05 | -1,50 | 1,2E-48 |
| ADIPOQ | Q15848 | -2,38 | 3,39E-05 | -1,18 | 1,2E-45 |
| CDH13 | P55290 | -2,39 | 0,000137743 | -1,30 | 1,7E-63 |
| FHL1 | Q13642 | -2,4 | 2,04E-06 | -1,85 | 2,1E-69 |
| CA4 | P22748 | -2,4 | 2,85E-05 | -2,22 | 2,5E-68 |
| ZW10 | O43264 | -2,45 | 1,06E-05 | 0,34 | 3,5E-29 |
| SUSD2 | Q9UGT4 | -2,46 | 1,25E-05 | -1,41 | 6,1E-52 |
| LIMCH1 | Q9UPQ0 | -2,47 | 7,37E-07 | -1,11 | 2,3E-62 |
| SPARCL1 | Q14515 | -2,47 | 8,42E-06 | -1,08 | 5,2E-56 |
| AOC3 | Q16853 | -2,48 | 4,00E-07 | -1,30 | 5,6E-66 |
| CAV2 | P51636 | -2,52 | 7,66E-06 | -2,40 | 5,2E-53 |
| HSPB6 | O14558 | -2,53 | 2,34E-05 | -1,39 | 6,1E-65 |
| GPRC5A | Q8NFJ5 | -2,53 | 2,73E-07 | -1,29 | 1,4E-61 |
| SCEL | O95171 | -2,54 | 2,13E-05 | -1,26 | 1,0E-37 |
| ADH1B | P00325 | -2,57 | 3,74E-06 | -1,95 | 4,3E-68 |
| UBR4 | Q5T4S7 | -2,59 | 1,25E-05 | 0,15 | 5,4E-15 |
| LYVE1 | Q9Y5Y7 | -2,6 | 7,88E-06 | -1,62 | 1,7E-71 |
| ACE | P12821 | -2,63 | 4,57E-05 | -1,25 | 1,1E-57 |
| CD36 | P16671 | -2,68 | 2,53E-05 | -1,96 | 5,6E-60 |
| ENPEP | Q07075 | -2,7 | 1,98E-05 | -1,06 | 2,0E-33 |
| CAV1 | Q03135 | -2,78 | 6,40E-07 | -2,12 | 4,0E-82 |
| ESAM | Q96AP7 | -2,81 | 6,89E-07 | -1,34 | 6,5E-83 |
| OLFML1 | Q6UWY5 | -2,85 | 8,26E-06 | -1,99 | 2,0E-70 |
| FABP4 | P15090 | -3,33 | 1,37E-05 | -1,75 | 4,2E-65 |
| AGER | Q15109 | -5,22 | 1,26E-06 | -1,94 | 2,9E-92 |
