# Supplementary material for: New proteomic signature in circulating extracellular vesicles from tumor-draining and peripheral veins of patients with lung adenocarcinoma
Source: Research Square preprint supplement (doi:10.21203/rs.3.rs-7543827/v1), 2025-09-23
Supplement: Supplementary file 2 [file 58216666ca8a71cd07c0db38.docx]

**Supplementary Table 2.** Deregulated proteins in extracellular vesicles (EVs) purified from Tumor-draining vein (TDV) as compared to EVs purified from Peripheral vein (PV) identified by mass spectrometry, according to the following thresholds: |log2 fold change| ≥ 1 and adjusted p value (Benjamini-Hochberg multiple testing correction) ≤ 0.05.

| **Official Gene Symbol** | **Uniprot ID** | **log2 Fold Change (TDV vs PV)** | **adjusted p value** |
| --- | --- | --- | --- |
| MUC5B | Q9HC84 | 5,04 | 0,005163828 |
| CCT6A | P40227 | 3,74 | 0,00011637 |
| UNC45A | Q9H3U1 | 3,53 | 0,005163828 |
| IGHV5-51 | A0A0C4DH38 | 3,52 | 0,010761768 |
| ATP1A1 | P05023 | 3,46 | 0,001897142 |
| STXBP3 | O00186 | 3,46 | 0,00272099 |
| SSC5D | A1L4H1 | 3,28 | 0,000374093 |
| VDAC1 | P21796 | 3,28 | 0,000752903 |
| F12 | P00748 | 3,16 | 6,88E-06 |
| SRPRB | Q9Y5M8 | 3,15 | 0,001117865 |
| PRG4 | Q92954 | 3,08 | 1,75E-07 |
| TACC1 | O75410 | 3,06 | 0,009133315 |
| ECM1 | Q16610 | 3,03 | 9,84E-05 |
| ESYT1 | Q9BSJ8 | 2,99 | 0,000687073 |
| GPLD1 | P80108 | 2,87 | 0,003160593 |
| KLC1 | Q07866 | 2,82 | 0,000427937 |
| ANO10 | Q9NW15 | 2,81 | 0,004454711 |
| DOK3 | Q7L591 | 2,8 | 0,006977266 |
| PDLIM5 | Q96HC4 | 2,79 | 0,001398696 |
| ETHE1 | O95571 | 2,77 | 0,001419739 |
| CDSN | Q15517 | 2,73 | 0,000197884 |
| FBLN1 | P23142 | 2,72 | 0,000117672 |
| IGHV1-24 | A0A0C4DH33 | 2,68 | 0,010761768 |
| CSRP1 | P21291 | 2,63 | 0,013271342 |
| IST1 | P53990 | 2,62 | 0,005529207 |
| PSMA7 | O14818 | 2,61 | 0,005529207 |
| USP9X | Q93008 | 2,59 | 0,000427937 |
| TSPAN9 | O75954 | 2,58 | 0,002819229 |
| ATP8A1 | Q9Y2Q0 | 2,57 | 0,000241783 |
| SAA4 | P35542 | 2,47 | 0,000160054 |
| SPCS2 | Q15005 | 2,47 | 0,003160593 |
| KLKB1 | P03952 | 2,46 | 0,000193921 |
| VTN | P04004 | 2,46 | 4,30E-07 |
| SQOR | Q9Y6N5 | 2,45 | 0,001117865 |
| C1QC | P02747 | 2,43 | 7,07E-05 |
| GARS1 | P41250 | 2,41 | 1,56E-05 |
| IGHV4OR15-8 | A0A075B7B6 | 2,4 | 0,004749894 |
| IGHV4-28 | A0A0C4DH34 | 2,35 | 0,00464317 |
| FN1 | P02751 | 2,34 | 0,000427937 |
| DOCK8 | Q8NF50 | 2,33 | 0,00113822 |
| C1QA | P02745 | 2,31 | 0,000114547 |
| C1QB | P02746 | 2,3 | 0,00010095 |
| CHCHD3 | Q9NX63 | 2,3 | 0,003092678 |
| AK1 | P00568 | 2,28 | 0,012006362 |
| FCGR2A | P12318 | 2,27 | 0,00167845 |
| ITIH3 | Q06033 | 2,26 | 0,000922349 |
| GSR | P00390 | 2,25 | 0,025247146 |
| ITIH2 | P19823 | 2,24 | 0,001387605 |
| HADHA | P40939 | 2,22 | 0,000740997 |
| SERPINC1 | P01008 | 2,21 | 1,05E-05 |
| CPN1 | P15169 | 2,13 | 0,000160054 |
| SUCLG1 | P53597 | 2,08 | 8,69E-06 |
| MTHFD1 | P11586 | 2,05 | 0,005219907 |
| ATP5MK | Q96IX5 | 2,03 | 0,00860973 |
| MCEMP1 | Q8IX19 | 2,03 | 0,00161585 |
| UQCRC2 | P22695 | 2,03 | 0,004211563 |
| DBI | P07108 | 2,02 | 0,019083761 |
| NCKAP1 | Q9Y2A7 | 2,02 | 0,013819146 |
| LTF | P02788 | 1,99 | 0,010408772 |
| MYO9B | Q13459 | 1,98 | 0,000752903 |
| APOE | P02649 | 1,95 | 0,000752903 |
| C1S | P09871 | 1,95 | 0,000561361 |
| ROCK2 | O75116 | 1,94 | 0,003435149 |
| TAPBP | O15533 | 1,94 | 0,035816355 |
| LMAN2 | Q12907 | 1,93 | 0,003092678 |
| COMT | P21964 | 1,9 | 0,01047747 |
| GPD2 | P43304 | 1,9 | 0,003732614 |
| CFP | P27918 | 1,88 | 0,00113822 |
| MVP | Q14764 | 1,88 | 0,00113822 |
| NDUFS3 | O75489 | 1,87 | 0,00666639 |
| APOL1 | O14791 | 1,86 | 0,003160593 |
| PIGR | P01833 | 1,85 | 0,005163828 |
| ITIH1 | P19827 | 1,84 | 0,000193061 |
| IGHV3OR15-7 | A0A075B7D8 | 1,83 | 0,003435149 |
| APOC4 | P55056 | 1,82 | 0,010408772 |
| ERP29 | P30040 | 1,8 | 0,009357291 |
| GIT1 | Q9Y2X7 | 1,8 | 0,000632493 |
| APOA5 | Q6Q788 | 1,79 | 0,005274248 |
| PRAF2 | O60831 | 1,77 | 0,012869776 |
| AFG3L2 | Q9Y4W6 | 1,76 | 0,004211563 |
| AGPS | O00116 | 1,76 | 0,01752043 |
| CHMP6 | Q96FZ7 | 1,75 | 0,010527381 |
| GK | P32189 | 1,75 | 0,007439848 |
| PGLYRP2 | Q96PD5 | 1,75 | 0,027971085 |
| RTN1 | Q16799 | 1,75 | 0,007370395 |
| COL6A1 | P12109 | 1,73 | 0,010348489 |
| HRG | P04196 | 1,72 | 0,000460469 |
| MFGE8 | Q08431 | 1,72 | 0,010761768 |
| ANPEP | P15144 | 1,71 | 0,012869776 |
| ARL1 | P40616 | 1,71 | 0,000683682 |
| CHMP4A | Q9BY43 | 1,71 | 0,010761768 |
| APOB | P04114 | 1,7 | 0,005953852 |
| M6PR | P20645 | 1,7 | 0,000973656 |
| PZP | P20742 | 1,7 | 0,01207565 |
| SELPLG | Q14242 | 1,69 | 0,0072182 |
| VWA5A | O00534 | 1,68 | 0,019546533 |
| STIP1 | P31948 | 1,66 | 0,010761768 |
| GSTM3 | P21266 | 1,65 | 0,006882816 |
| PCYOX1 | Q9UHG3 | 1,63 | 0,005943017 |
| C1R | P00736 | 1,62 | 0,006977266 |
| AHNAK | Q09666 | 1,61 | 0,033453847 |
| BMP1 | P13497 | 1,61 | 0,002929196 |
| SLK | Q9H2G2 | 1,6 | 0,012735232 |
| TMEM40 | Q8WWA1 | 1,6 | 0,002161694 |
| SERPING1 | P05155 | 1,59 | 0,00011637 |
| UFM1 | P61960 | 1,58 | 0,024387411 |
| LRRC59 | Q96AG4 | 1,56 | 0,00860973 |
| HINT2 | Q9BX68 | 1,53 | 0,014347975 |
| NLRX1 | Q86UT6 | 1,53 | 0,016488416 |
| RHBDF2 | Q6PJF5 | 1,52 | 0,006057433 |
| EFR3A | Q14156 | 1,51 | 0,020097585 |
| GRHPR | Q9UBQ7 | 1,51 | 0,003619564 |
| PDGFB | P01127 | 1,51 | 0,005067556 |
| STX11 | O75558 | 1,49 | 0,003318568 |
| HSPD1 | P10809 | 1,48 | 0,005527433 |
| APOC1 | P02654 | 1,47 | 0,001909126 |
| ACOT9 | Q9Y305 | 1,46 | 0,023081524 |
| ALDH9A1 | P49189 | 1,44 | 0,019257889 |
| RTN4 | Q9NQC3 | 1,43 | 0,000427937 |
| CLTC | Q00610 | 1,42 | 0,0072182 |
| PLA2G7 | Q13093 | 1,42 | 0,013971599 |
| RAC2 | P15153 | 1,42 | 0,038398813 |
| CCT3 | P49368 | 1,4 | 0,001926899 |
| NAPG | Q99747 | 1,4 | 0,02224221 |
| NECTIN2 | Q92692 | 1,4 | 0,025251172 |
| NSF | P46459 | 1,4 | 0,012316773 |
| MENT | Q9BUN1 | 1,39 | 0,018292109 |
| C3 | P01024 | 1,38 | 0,000752903 |
| HLA-E | P13747 | 1,38 | 0,045583536 |
| MYO5A | Q9Y4I1 | 1,38 | 0,023007181 |
| PON1 | P27169 | 1,38 | 0,015104583 |
| TOMM70 | O94826 | 1,38 | 0,004465298 |
| DEFA1B | P59665 | 1,37 | 0,012869776 |
| IGKV1D-13 | A0A0B4J2D9 | 1,36 | 0,044358883 |
| DYNC1H1 | Q14204 | 1,35 | 0,003372625 |
| EML3 | Q32P44 | 1,35 | 0,00798054 |
| PDIA5 | Q14554 | 1,35 | 0,021780221 |
| CYB5R1 | Q9UHQ9 | 1,34 | 0,008125336 |
| KNG1 | P01042 | 1,33 | 0,00464317 |
| TM9SF3 | Q9HD45 | 1,33 | 0,022309222 |
| APOD | P05090 | 1,32 | 0,006284777 |
| APMAP | Q9HDC9 | 1,31 | 0,013470424 |
| HLA-A | P04439 | 1,3 | 0,045148108 |
| PSMC2 | P35998 | 1,27 | 0,010761768 |
| AMBP | P02760 | 1,26 | 0,005274248 |
| DCD | P81605 | 1,26 | 0,016995372 |
| FASN | P49327 | 1,26 | 0,023970281 |
| ATP5F1B | P06576 | 1,25 | 0,011741948 |
| ROCK1 | Q13464 | 1,25 | 0,014953809 |
| GGH | Q92820 | 1,24 | 0,011294657 |
| PGRMC1 | O00264 | 1,24 | 0,003445327 |
| COPS3 | Q9UNS2 | 1,23 | 0,043359024 |
| EXOC2 | Q96KP1 | 1,22 | 0,019811628 |
| ITPR2 | Q14571 | 1,17 | 0,024742561 |
| CANX | P27824 | 1,16 | 0,025247146 |
| CERS2 | Q96G23 | 1,15 | 0,015320762 |
| PI4KA | P42356 | 1,15 | 0,025247146 |
| IMMT | Q16891 | 1,14 | 0,004465298 |
| APOA2 | P02652 | 1,13 | 0,019167225 |
| GRB2 | P62993 | 1,13 | 0,020186629 |
| ANGPTL6 | Q8NI99 | 1,11 | 0,010527381 |
| CFH | P08603 | 1,11 | 0,047992194 |
| HSD17B10 | Q99714 | 1,11 | 0,025247146 |
| UBE2L3 | P68036 | 1,11 | 0,004601418 |
| CLINT1 | Q14677 | 1,1 | 0,035371893 |
| DSP | P15924 | 1,1 | 0,023237131 |
| DYNC1LI1 | Q9Y6G9 | 1,1 | 0,017346644 |
| KIF2A | O00139 | 1,1 | 0,048185135 |
| RTN2 | O75298 | 1,09 | 0,034705416 |
| CKAP5 | Q14008 | 1,08 | 0,023007181 |
| PLAA | Q9Y263 | 1,08 | 0,030698379 |
| HABP2 | Q14520 | 1,06 | 0,012869776 |
| IVD | P26440 | 1,06 | 0,025247146 |
| MPST | P25325 | 1,02 | 0,008166559 |
| F11 | P03951 | 1,01 | 0,0072182 |
| MTSS1 | O43312 | 1,01 | 0,025309349 |
| STXBP5 | Q5T5C0 | -1 | 0,033883098 |
| FTH1 | P02794 | -1,01 | 0,045148108 |
| HSPB1 | P04792 | -1,01 | 0,043359024 |
| PKM | P14618 | -1,01 | 0,012528461 |
| PSMB3 | P49720 | -1,01 | 0,020345051 |
| FYB1 | O15117 | -1,02 | 0,0072182 |
| GSTO1 | P78417 | -1,02 | 0,0492201 |
| TPM3 | P06753 | -1,03 | 0,020792797 |
| PDIA3 | P30101 | -1,04 | 0,007037555 |
| CFB | P00751 | -1,05 | 0,009827664 |
| CORO1A | P31146 | -1,05 | 0,010348489 |
| LYN | P07948 | -1,06 | 0,010239133 |
| SPN | P16150 | -1,07 | 0,016512733 |
| ALOX12 | P18054 | -1,08 | 0,024742561 |
| KALRN | O60229 | -1,08 | 0,047015725 |
| SPARC | P09486 | -1,08 | 0,03756841 |
| NAPA | P54920 | -1,1 | 0,025128912 |
| XPNPEP1 | Q9NQW7 | -1,1 | 0,034391058 |
| GNB2 | P62879 | -1,11 | 0,045103393 |
| MAPRE2 | Q15555 | -1,11 | 0,011212337 |
| PDE5A | O76074 | -1,13 | 0,015304526 |
| CD69 | Q07108 | -1,14 | 0,017711253 |
| TPT1 | P13693 | -1,14 | 0,02950035 |
| ACTR3 | P61158 | -1,15 | 0,002348986 |
| DAB2 | P98082 | -1,15 | 0,021780221 |
| GPSM3 | Q9Y4H4 | -1,15 | 0,020097585 |
| NIPSNAP3A | Q9UFN0 | -1,15 | 0,018459208 |
| MIF | P14174 | -1,16 | 0,005953852 |
| RAP2B | P61225 | -1,16 | 0,030698379 |
| ORM1 | P02763 | -1,17 | 0,017640205 |
| STEAP3 | Q658P3 | -1,17 | 0,04841568 |
| WASF2 | Q9Y6W5 | -1,17 | 0,038930642 |
| CD55 | P08174 | -1,18 | 0,016116212 |
| PGD | P52209 | -1,18 | 0,009873924 |
| PSMB2 | P49721 | -1,18 | 0,022408114 |
| GMFG | O60234 | -1,19 | 0,010348489 |
| PSMD2 | Q13200 | -1,2 | 0,038216134 |
| UBE2N | P61088 | -1,2 | 0,005953852 |
| VASP | P50552 | -1,2 | 0,006158341 |
| ADAM10 | O14672 | -1,21 | 0,046124199 |
| TSG101 | Q99816 | -1,21 | 0,010772917 |
| CAPZA2 | P47755 | -1,22 | 0,031687175 |
| CLIC4 | Q9Y696 | -1,22 | 0,009311764 |
| GP1BA | P07359 | -1,23 | 0,041851392 |
| MGLL | Q99685 | -1,23 | 0,007375681 |
| PRKCQ | Q04759 | -1,23 | 0,026408051 |
| ANXA5 | P08758 | -1,24 | 0,019201245 |
| CASP6 | P55212 | -1,24 | 0,049056759 |
| OTUB1 | Q96FW1 | -1,25 | 0,003092678 |
| PSMA1 | P25786 | -1,25 | 0,009188779 |
| SAR1A | Q9NR31 | -1,26 | 0,010761768 |
| RHEB | Q15382 | -1,28 | 0,041852867 |
| PPP1CA | P62136 | -1,29 | 0,00745538 |
| PRDX4 | Q13162 | -1,29 | 0,006158341 |
| DMTN | Q08495 | -1,3 | 0,011294657 |
| INPP4B | O15327 | -1,3 | 0,038930642 |
| TMED8 | Q6PL24 | -1,3 | 0,02676502 |
| PLEK | P08567 | -1,31 | 0,01239374 |
| LASP1 | Q14847 | -1,32 | 0,045148108 |
| PSMD13 | Q9UNM6 | -1,33 | 0,009188779 |
| EHD3 | Q9NZN3 | -1,34 | 0,00860973 |
| VTA1 | Q9NP79 | -1,34 | 0,036145489 |
| DNAJB6 | O75190 | -1,35 | 0,032237756 |
| ERBIN | Q96RT1 | -1,35 | 0,014977213 |
| ACTB | P60709 | -1,36 | 0,007439848 |
| CAPZB | P47756 | -1,37 | 0,005060358 |
| RAP1GDS1 | P52306 | -1,37 | 0,01467737 |
| HLA-DRA | P01903 | -1,38 | 0,013246652 |
| USP5 | P45974 | -1,38 | 0,011294657 |
| CAPNS1 | P04632 | -1,39 | 0,011221589 |
| TKT | P29401 | -1,39 | 0,02647131 |
| LDHB | P07195 | -1,4 | 0,008800811 |
| GP1BB | P13224 | -1,41 | 0,014461113 |
| PSMA3 | P25788 | -1,42 | 0,005802765 |
| LAT | O43561 | -1,43 | 0,008085796 |
| GP5 | P40197 | -1,44 | 0,005953852 |
| PTP4A2 | Q12974 | -1,45 | 0,003435149 |
| TAGLN2 | P37802 | -1,45 | 0,001427344 |
| ACTR1A | P61163 | -1,46 | 0,004535614 |
| POTEJ | P0CG39 | -1,46 | 0,013011404 |
| PPP2R1A | P30153 | -1,48 | 0,01373111 |
| DUSP3 | P51452 | -1,49 | 0,00161585 |
| GP6 | Q9HCN6 | -1,53 | 0,014519195 |
| GSTP1 | P09211 | -1,53 | 0,021241616 |
| YWHAZ | P63104 | -1,54 | 0,010527381 |
| DOK2 | O60496 | -1,55 | 0,003543991 |
| HSPA5 | P11021 | -1,55 | 0,001133384 |
| P2RX1 | P51575 | -1,55 | 0,011221589 |
| RAP1A | P62834 | -1,55 | 0,006158341 |
| GNAQ | P50148 | -1,56 | 0,022062286 |
| NAP1L1 | P55209 | -1,56 | 0,005060358 |
| ACTA1 | P68133 | -1,57 | 0,012530983 |
| DNM1L | O00429 | -1,57 | 0,000752903 |
| NCK2 | O43639 | -1,57 | 0,002161694 |
| PAK2 | Q13177 | -1,58 | 0,00745538 |
| PRKACB | P22694 | -1,58 | 0,020792797 |
| ACTR2 | P61160 | -1,59 | 0,006158341 |
| CLEC1B | Q9P126 | -1,6 | 0,038697599 |
| PARK7 | Q99497 | -1,6 | 0,001918819 |
| PRDX6 | P30041 | -1,6 | 0,013690512 |
| HIBCH | Q6NVY1 | -1,61 | 0,007690967 |
| PDIA4 | P13667 | -1,61 | 0,009928527 |
| S100A6 | P06703 | -1,61 | 0,001588033 |
| ATP6V0D1 | P61421 | -1,62 | 0,003697545 |
| HPCAL1 | P37235 | -1,63 | 0,007309002 |
| SLFN14 | P0C7P3 | -1,63 | 0,017752332 |
| HCLS1 | P14317 | -1,64 | 0,028352678 |
| S100A4 | P26447 | -1,64 | 0,006995953 |
| GC | P02774 | -1,65 | 0,000555018 |
| PLCB2 | Q00722 | -1,65 | 0,032904145 |
| TUBB4A | P04350 | -1,65 | 0,022024915 |
| XPO7 | Q9UIA9 | -1,65 | 0,035816355 |
| PDCD10 | Q9BUL8 | -1,67 | 0,005274248 |
| YWHAH | Q04917 | -1,67 | 0,014097472 |
| ARF3 | P61204 | -1,68 | 0,010761768 |
| ARHGDIB | P52566 | -1,68 | 0,004384462 |
| RNH1 | P13489 | -1,68 | 0,027271976 |
| KPNB1 | Q14974 | -1,69 | 0,004651889 |
| PRDX5 | P30044 | -1,69 | 0,017321264 |
| TPM4 | P67936 | -1,71 | 0,005953852 |
| TWF2 | Q6IBS0 | -1,71 | 0,016599066 |
| CAB39 | Q9Y376 | -1,72 | 0,000303396 |
| RANBP1 | P43487 | -1,72 | 0,017840008 |
| RSU1 | Q15404 | -1,72 | 0,003318568 |
| CSK | P41240 | -1,73 | 0,011636889 |
| ASL | P04424 | -1,75 | 0,048185135 |
| PPCS | Q9HAB8 | -1,75 | 0,034650694 |
| PSMB9 | P28065 | -1,75 | 0,009561612 |
| ARPC4 | P59998 | -1,77 | 0,000958604 |
| B2M | P61769 | -1,77 | 0,001419739 |
| ARPC2 | O15144 | -1,78 | 0,003076856 |
| LGALSL | Q3ZCW2 | -1,79 | 0,001419739 |
| SOD1 | P00441 | -1,79 | 0,00194803 |
| DDAH2 | O95865 | -1,8 | 0,001812206 |
| ILK | Q13418 | -1,8 | 0,003543991 |
| CFL1 | P23528 | -1,81 | 0,002389777 |
| USP14 | P54578 | -1,82 | 0,002739158 |
| CRLF3 | Q8IUI8 | -1,84 | 0,045799131 |
| MPP1 | Q00013 | -1,84 | 0,006158341 |
| STK38 | Q15208 | -1,84 | 0,000683682 |
| ATIC | P31939 | -1,86 | 0,008085796 |
| TMOD3 | Q9NYL9 | -1,86 | 0,003092678 |
| ARPC3 | O15145 | -1,87 | 0,002161694 |
| PPIA | P62937 | -1,87 | 0,001387605 |
| APOH | P02749 | -1,88 | 0,00011151 |
| PNP | P00491 | -1,88 | 0,002098122 |
| WDR1 | O75083 | -1,88 | 0,001419739 |
| TNIK | Q9UKE5 | -1,89 | 0,004214604 |
| GSPT1 | P15170 | -1,9 | 0,00478922 |
| COTL1 | Q14019 | -1,91 | 0,000958604 |
| DERA | Q9Y315 | -1,91 | 0,000722663 |
| ENO1 | P06733 | -1,91 | 0,001481559 |
| SEPTIN2 | Q15019 | -1,91 | 0,00113822 |
| PFN1 | P07737 | -1,92 | 0,002370816 |
| PGK1 | P00558 | -1,93 | 0,000752903 |
| SEPTIN7 | Q16181 | -1,94 | 0,001557169 |
| SH3BGRL3 | Q9H299 | -1,94 | 0,00206868 |
| GP9 | P14770 | -2 | 0,005943017 |
| CAPZA1 | P52907 | -2,02 | 0,002635819 |
| PPIF | P30405 | -2,09 | 0,023456819 |
| SARS1 | P49591 | -2,1 | 0,001059404 |
| CALD1 | Q05682 | -2,11 | 0,00021558 |
| ARPC5 | O15511 | -2,12 | 0,004353439 |
| GLUD1 | P00367 | -2,12 | 0,005163828 |
| EIF5A | P63241 | -2,14 | 0,001780933 |
| ETFB | P38117 | -2,14 | 0,006809226 |
| YWHAQ | P27348 | -2,16 | 0,005274248 |
| HBD | P02042 | -2,18 | 0,011965692 |
| ABI1 | Q8IZP0 | -2,23 | 0,0072182 |
| PTPN1 | P18031 | -2,23 | 0,021241616 |
| SRC | P12931 | -2,23 | 0,000752903 |
| HSPE1 | P61604 | -2,24 | 0,025247146 |
| PF4 | P02776 | -2,25 | 0,000534311 |
| TPM1 | P09493 | -2,28 | 0,002431113 |
| GDI2 | P50395 | -2,32 | 0,019201245 |
| UBE2V1 | Q13404 | -2,34 | 0,011390851 |
| GET3 | O43681 | -2,36 | 0,022309222 |
| PTPRJ | Q12913 | -2,36 | 0,003127016 |
| TMBIM1 | Q969X1 | -2,45 | 0,022024915 |
| TOM1L2 | Q6ZVM7 | -2,46 | 0,014754364 |
| STX4 | Q12846 | -2,47 | 0,001909126 |
| UGP2 | Q16851 | -2,47 | 0,005045741 |
| YWHAB | P31946 | -2,49 | 0,000722663 |
| HSPA8 | P11142 | -2,52 | 0,000561361 |
| YWHAE | P62258 | -2,52 | 0,000752903 |
| ITGB2 | P05107 | -2,58 | 0,023007181 |
| HLA-B | P01889 | -2,7 | 0,000257986 |
| SCAMP2 | O15127 | -2,75 | 0,014519195 |
| IGHD | P01880 | -2,78 | 0,027819184 |
| PSME1 | Q06323 | -2,87 | 0,000174633 |
| LAP3 | P28838 | -3,69 | 0,000160054 |
| ATP2B4 | P23634 | -3,73 | 0,007375681 |
| MYH7B | A7E2Y1 | -4,28 | 0,010400085 |
